# Supplementary material for: Measuring Subaqueous Progradation of the Wax Lake Delta with a Model of Flow Direction Divergence
Source: Copernicus journal article supplement (doi:10.5194/esurf-2018-47), 2018-06-22
Supplement: Supplementary file 1 [file SupplementaryData_v1.xlsx]

## Sheet: Sheet1
							East Pass			Pintail Pass			Greg Pass			Main Pass			Gadwall Pass			Mallard Pass			Campground
Image Date	Image Time (UTC)	Scene ID	River Discharge (Cubic Meters per second)	Tide Level (m MLLW)	dh/dt (m/hr)	Total Delta Area (square km)	Easting (m)	Northing (m)	Distance From Apex (m)	Easting (m)	Northing (m)	Distance From Apex (m)	Easting (m)	Northing (m)	Distance From Apex (m)	Easting (m)	Northing (m)	Distance From Apex (m)	Easting (m)	Northing (m)	Distance From Apex (m)	Easting (m)	Northing (m)	Distance From Apex (m)	Easting (m)	Northing (m)	Distance From Apex (m)
1974-01-30		LM1024040197030AAA05				38.6591	653022	3.26316e+06	4244.66										647609	3.26378e+06	5300.26				646753	3.2668e+06	4935.29
1979-02-09	15:57:00	LM30240401979040AAA05				47.3607	652500	3.26367e+06	3612.44							648584	3.26072e+06	7161.3	646547	3.26366e+06	6221.12
1983-01-13	16:07:00	LT40230401983013AAA09				53.682	654388	3.26259e+06	5334.6	653443	3.26229e+06	5210.7	651850	3.26098e+06	6209.97	649343	3.26021e+06	7353.19	647051	3.26332e+06	6025.85	648232	3.2661e+06	3608.69
1984-11-23	16:07:00	LT50230401984328AAA07				65.2539	654129	3.26286e+06	4976.96	653356	3.26265e+06	4842.1	653045	3.26131e+06	6036.81	651465	3.26031e+06	6880.36	647447	3.26245e+06	6347.69	645239	3.2639e+06	7224.36	644877	3.26591e+06	6915.38
1986-01-13	16:05:00	LT50230401986013AAA03				65.534	654584	3.26286e+06	5215.9	653636	3.26237e+06	5203.8	651959	3.26123e+06	5958.07	649493	3.26005e+06	7458.55	648127	3.2627e+06	5716.96	646659	3.26487e+06	5524.76	645644	3.26602e+06	6140.17
1987-12-02	16:06:00	LT50230401987336AAA16				62.2988	654588	3.26283e+06	5241.89	653965	3.26169e+06	5956.93	652236	3.26181e+06	5402.25	650024	3.26062e+06	6766.77	646779	3.26203e+06	7112.21	647208	3.26489e+06	5020.09	646416	3.26684e+06	5268.4
1988-12-04	16:08:00	LT50230401988339AAA02				62.2787	654581	3.26278e+06	5283.11	654091	3.26143e+06	6244.33	652056	3.26099e+06	6207.03	650621	3.26037e+06	6896.39	647637	3.26268e+06	6047.84	646350	3.26431e+06	6048.4	645757	3.26642e+06	5965.66
1989-09-18	16:04:00	LT50230401989261XXX02				69.3299	655287	3.26236e+06	6031.2	653926	3.26187e+06	5772.22	652253	3.26049e+06	6725.49	649687	3.25998e+06	7476.41	647391	3.2626e+06	6276.97	645890	3.26419e+06	6514.88
1991-04-01	16:00:00	LT50230401991091AAA03				85.9451	654914	3.26259e+06	5625.84	655370	3.26006e+06	8027.5				649914	3.25827e+06	9090.23	647089	3.26102e+06	7684.36	645960	3.26385e+06	6614.36	645448	3.26576e+06	6386.83
1991-10-10	16:02:00	LT50230391991283XXX02				71.6016	654707	3.26237e+06	5692.11	653703	3.26155e+06	5989.91	651955	3.26219e+06	5004.99	650043	3.25849e+06	8842.96	647276	3.26246e+06	6456.42
1992-01-14	16:02:00	LT50230401992014XXX02				78.617	656081	3.26257e+06	6380.21	654274	3.26118e+06	6541.88	652153	3.26006e+06	7140.75	650243	3.26024e+06	7096.26	646682	3.26139e+06	7644.95	646171	3.26374e+06	6490.42	646008	3.26553e+06	5901.33
1993-02-17	16:00:00	LT50230401993048XXX02				85.6154	654804	3.26263e+06	5529.91	654095	3.26161e+06	6082.85	652934	3.25962e+06	7672.7	651362	3.25898e+06	8216.74	645495	3.26122e+06	8585.87	645964	3.26351e+06	6791.69	644887	3.26406e+06	7470.01
1994-12-14	15:45:00	LT50220401994348XXX02				68.9899	654280	3.26273e+06	5163.28	653861	3.26135e+06	6235.55	652135	3.26056e+06	6642.58	649911	3.25948e+06	7903.63	646877	3.26192e+06	7126.1	646382	3.26467e+06	5860.33	646054	3.26554e+06	5855.23
1996-11-08	15:58:00	LT50230401996313AAA01	2443.74			79.5284	655442	3.26228e+06	6188.01	653789	3.26186e+06	5734.45				650770	3.25982e+06	7417.82	645889	3.26221e+06	7632.87	645002	3.26455e+06	7173.12	644984	3.26491e+06	7064.64
1997-03-21	05:08:00	SPOT-25992919703211708422P	5748.32			86.6784	655209	3.26249e+06	5876.62	654248	3.26134e+06	6391.57	652524	3.26095e+06	6293.6	651876	3.25868e+06	8511.58	645967	3.26026e+06	8971.85	646669	3.26449e+06	5685.71	644593	3.2649e+06	7440.25
1998-05-12	04:48:00	SPOT-25982919805121648252X	5153.67			77.8263	655165	3.26191e+06	6325.49	653817	3.26162e+06	5961.8	652156	3.25944e+06	7764.48	650015	3.25985e+06	7523.28	646524	3.26131e+06	7814.45	646192	3.26441e+06	6141.76	646070	3.26593e+06	5741.46
1999-02-18	16:17:00	LT50230401999049XXX01	5210.3			93.8071	655510	3.26177e+06	6639.95	654135	3.26064e+06	6988.95	652256	3.25945e+06	7753.56	650242	3.25908e+06	8230.03	645869	3.26068e+06	8715.52	645255	3.26405e+06	7143.7	644812	3.26461e+06	7329.21
2000-01-20	16:13:00	LT50230402000020AAA02	1911.39			98.02	655894	3.26105e+06	7449.51	654315	3.26082e+06	6888.11	653234	3.25965e+06	7696.02	651288	3.25911e+06	8085.86	645168	3.26212e+06	8244.81	645233	3.26463e+06	6929.35	643877	3.26361e+06	8577.13
2001-11-02	16:18:00	LT50230402001310LGS01	1551.76			83.0683	655068	3.26237e+06	5895.78	654033	3.26115e+06	6478.82	652390	3.26035e+06	6874.86	649738	3.25875e+06	8653.2	645046	3.26126e+06	8888.09	646172	3.26437e+06	6179.12	646191	3.26437e+06	6163.97
2002-11-25	16:09:00	LT50230402002329LGS01	1970.85			92.5268	655377	3.26203e+06	6348.26	654529	3.2599e+06	7825.97	652962	3.25928e+06	8008.42	649839	3.25889e+06	8491.52	645791	3.26073e+06	8734.08	646147	3.26447e+06	6156.09	645118	3.26511e+06	6874.19
2003-11-28	16:16:00	LT50230402003332LGS01	2803.37			101.882	655280	3.26227e+06	6093.2				653423	3.25948e+06	7901.28	651759	3.25851e+06	8675.23	645171	3.26005e+06	9656.95	645443	3.26409e+06	6957.14	643577	3.26399e+06	8703.08
2004-10-29	16:23:00	LT50230402004303EDC00	1308.24			100.812	655651	3.26146e+06	6970.67	654416	3.26045e+06	7277.49	652412	3.26041e+06	6813.29	651790	3.25834e+06	8847.46	645824	3.26102e+06	8499.52	644573	3.26519e+06	7374.82	643180	3.26382e+06	9135.36
2005-11-17	16:26:00	LT50230402005321EDC00	1129.84			112.048	655857	3.26085e+06	7590.44	654449	3.26067e+06	7084.84	653393	3.25929e+06	8079.79	651712	3.25824e+06	8942.3	644921	3.26027e+06	9663.39	645614	3.26456e+06	6602.37	643043	3.26348e+06	9391.36
2006-04-10	16:30:00	LT50230402006100EDC00	1800.95	0.205	0.048	108.359	656174	3.2618e+06	7020.56	653990	3.2613e+06	6328.24	652191	3.2594e+06	7801.53	648678	3.25969e+06	8073.7	644966	3.26049e+06	9476.2				643921	3.26391e+06	8416.66
2006-11-20	16:32:00	LT50230402006324EDC00	2010.5	-0.107	0.056	110.551	655773	3.2615e+06	7012.28	655458	3.25944e+06	8619.2	653317	3.2592e+06	8149.84	650318	3.25783e+06	9453.01	644922	3.26102e+06	9142.04	645051	3.2647e+06	7072.95	644261	3.26423e+06	7978.8
2007-08-19	16:31:00	LT50230402007231EDC00	1251.6	0.24	-0.05	86.0267	655422	3.26222e+06	6224.52	654229	3.26112e+06	6582.79	652706	3.2597e+06	7557.04	651301	3.25872e+06	8474.17	646731	3.26131e+06	7678.76	644973	3.26427e+06	7307.48	645470	3.26551e+06	6425.42
2008-09-22	16:23:00	LT50230402008266EDC00	2194.56	0.264	-0.068	94.8162	655496	3.26164e+06	6738.67	654637	3.26018e+06	7607.73	651229	3.2596e+06	7599.97				645367	3.26108e+06	8779	645401	3.26444e+06	6847.12	644011	3.26428e+06	8196.04
2009-11-06		Aerial Photomosaic	4800			88.5343	654891	3.26256e+06	5638.61	653975	3.26138e+06	6243.56	653020	3.26e+06	7313.77	650213	3.25859e+06	8720.32	645582	3.26022e+06	9254.59	645119	3.26447e+06	7094.01	645672	3.26541e+06	6257.3
2010-10-14	16:28:00	LT50230402010287EDC00	1449.82	0.212	-0.044	104.747	655634	3.26206e+06	6474.38	654750	3.26023e+06	7605.28	651692	3.25816e+06	9029.35	650560	3.2578e+06	9451.47	645787	3.26013e+06	9190.55	643739	3.26456e+06	8357.19	645313	3.26517e+06	6670.91
2011-10-01	16:26:00	LT50230402011274EDC00	1665.03	0.039	-0.062	113.895	656538	3.26123e+06	7691.61	654778	3.25997e+06	7853.83	652253	3.25883e+06	8375.09	650666	3.25739e+06	9847.76	645521	3.26019e+06	9315.22	644562	3.26449e+06	7605.61	644703	3.26557e+06	7154.3
2014-11-10	16:38:00	LC80230392014314LGN00	1603	-0.034	-0.028	110.142	655774	3.26154e+06	6975.55	654578	3.25983e+06	7907.99	651913	3.25872e+06	8468.31	650753	3.2577e+06	9530.11	645301	3.25967e+06	9850.97	645412	3.26345e+06	7288.81	644046	3.2645e+06	8087.45
2015-12-15	16:38:00	LC80230402015349LGN01	4219	0.224	-0.042	109.603	655986	3.26113e+06	7438.4	654812	3.25966e+06	8155.79	652243	3.25882e+06	8385.61	650695	3.25752e+06	9715.17	645185	3.25948e+06	10074	645223	3.26423e+06	7095.58	645594	3.26553e+06	6301.27
2016-04-05	16:38:00	LC8023042016096LGN01	5240	0.303	0.046	116.373	655746	3.26168e+06	6846.36	654743	3.25991e+06	7899.1	652170	3.25918e+06	8022.54	650891	3.25741e+06	9808.92	644835	3.25974e+06	10106.5	643344	3.26451e+06	8748.98	643939	3.26517e+06	7991.5
